# Supplementary material for: Staphylococcus aureus Behavior on Artificial Surfaces Mimicking Bone Environment
Source: MDPI journal article supplement (doi:10.3390/pathogens12030384), 2023-02-28
Supplement: s1 [file s1]

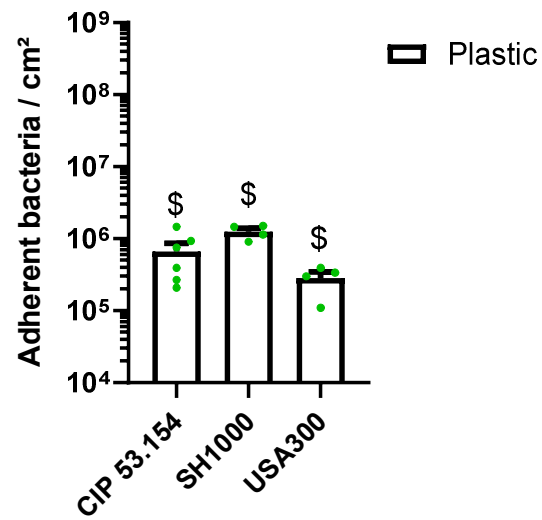

**Figure S1.** *S. aureus* adhesion on plastic support. Results represent the number of viable adherent bacteria per cm<sup>2</sup> for CIP 53.154, SH1000 and USA300.  $n = 4$  to 8. (green dots represent independent biological replicates). Wilcoxon Man Whitney test; \$ = stastically different from collagen and CaP coatings.
